# Supplementary material for: Microplastic Toxicity and Trophic Transfer in Freshwater Organisms: Ecotoxicological and Genotoxic Assessment in Spirodela polyrhiza (L.) Schleid. and Echinogammarus veneris (Heller, 1865) Treated with Polyethylene Microparticles
Source: MDPI journal article supplement (doi:10.3390/w15050921), 2023-02-27
Supplement: s1 [file s1]

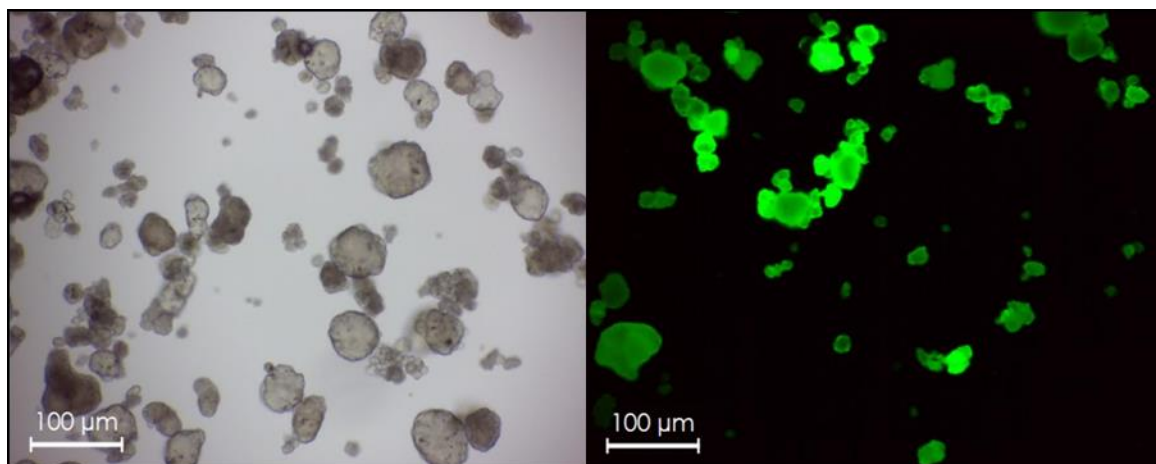

**Figure S1.** Microscope images of PE MPs, used to perform the exposures, observed in brightfield (left) and, stained with Nile red, in green fluorescence (ex. 450–490; em 515–565 nm) (right).

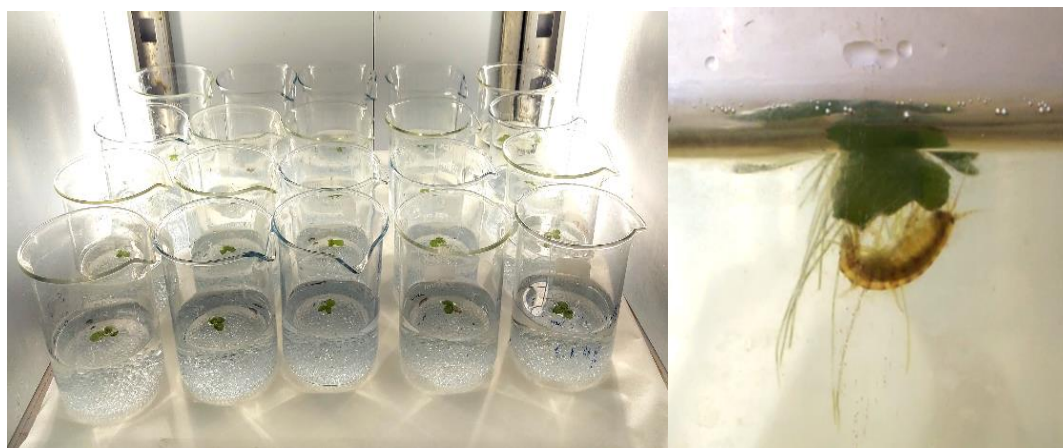

**Figure S2.** Specimens of *E. veneris* individually placed in 100 mL beakers filled with 100 mL tap water in presence of a single *S. polyrhiza* colony previously treated with PE MPs for 24h (left); Particular of *E. veneris* individual clung to plant roots during feeding (right).

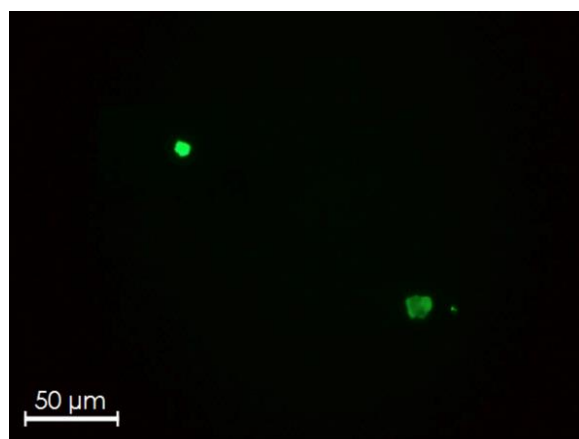

**Figure S3.** Microscope images of PE MPs, from digestive tracts of *E. veneris*, on a filter stained with Nile red, observed in green fluorescence.

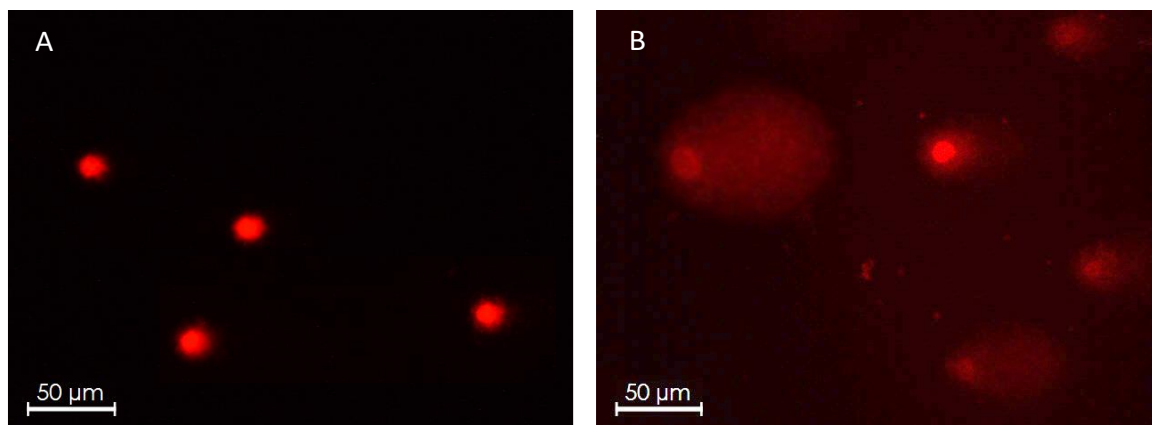

**Figure S4.** Representative images of nuclei from *Echinogammarus veneris* haemocytes, treated (B) or not (A) with 40 mg/L PE MPs in water for 24h, exhibiting different DNA damage level after Alkaline Comet assay procedure and EtBr staining.
